# Supplementary material for: A UV-Vis method for investigation of gallium(iii) complexation kinetics with NOTA and TRAP chelators: advantages, limitations and comparison with radiolabelling
Source: Royal Society of Chemistry journal article supplement (doi:10.1039/d4dt02383h), 2024-01-01
Supplement: d4dt02383h1.pdf [file d4dt02383h1.pdf]

## Supporting information

### UV-Vis method for investigation of gallium(III) complexation kinetics with NOTA and TRAP chelators: advantages, limitations and comparison with radiolabelling

Viktor Lebruška,<sup>a</sup> Tereza Dobrovolná,<sup>a</sup> Tereza Gemperle,<sup>a</sup> Vojtěch Kubíček,<sup>a\*</sup> Susanne Kossatz,<sup>b</sup> Petr Hermann<sup>a</sup>

<sup>a</sup> Department of Inorganic Chemistry, Faculty of Science, Charles University in Prague, Hlavova 2030, 128 40 Prague (Czech Republic). E-mail: [kubicek@natur.cuni.cz](mailto:kubicek@natur.cuni.cz) ; Tel.: +420 221951436; Fax: +420 221921253.

<sup>b</sup> Department of Nuclear Medicine, TUM University Hospital and Central Institute for Translational Cancer Research (TranslaTUM), School of Medicine, Technical University Munich (TUM), Einsteinstrasse 25, 81675, Munich, Germany

### Table of content

|                                                                                                                                                         |    |
|---------------------------------------------------------------------------------------------------------------------------------------------------------|----|
| <b>Figure S1.</b> Complexation of Ga <sup>III</sup> : example of results obtained by UV-Vis experiment for chelator H <sub>3</sub> nota .....           | 3  |
| <b>Figure S2.</b> Comparison of UV-Vis and <sup>1</sup> H NMR data for Ga <sup>III</sup> complexation kinetics with H <sub>3</sub> L <sup>2</sup> ..... | 4  |
| <b>Figure S3.</b> Characterization NMR spectra of chelator H <sub>3</sub> L <sup>1</sup> .....                                                          | 5  |
| <b>Figure S4.</b> Characterization NMR spectra of chelator H <sub>3</sub> L <sup>2</sup> .....                                                          | 6  |
| <b>Figure S5.</b> Characterization NMR spectra of chelator H <sub>3</sub> L <sup>3</sup> .....                                                          | 7  |
| <b>Figure S6.</b> Characterization NMR spectra of chelator H <sub>3</sub> L <sup>4</sup> .....                                                          | 8  |
| <b>Figure S7a.</b> Characterization NMR spectra of complex [GaL <sup>1</sup> ] at 25 °C .....                                                           | 9  |
| <b>Figure S7b.</b> Characterization NMR spectra of complex [GaL <sup>1</sup> ] at 90 °C .....                                                           | 10 |
| <b>Figure S8.</b> HRMS of complex [GaL <sup>1</sup> ] .....                                                                                             | 11 |
| <b>Figure S9.</b> Characterization NMR spectra of complex [GaL <sup>2</sup> ] .....                                                                     | 12 |
| <b>Figure S10.</b> HRMS of complex [GaL <sup>2</sup> ] .....                                                                                            | 13 |

|                                                                                                                                                                                                                         |    |
|-------------------------------------------------------------------------------------------------------------------------------------------------------------------------------------------------------------------------|----|
| <b>Figure S11.</b> Characterization NMR spectra of complex $[\text{GaL}^4]$ .....                                                                                                                                       | 14 |
| <b>Figure S12.</b> HRMS of complex $[\text{GaL}^4]$ .....                                                                                                                                                               | 15 |
| <b>Table S1.</b> Overall protonation constants of studied ligands .....                                                                                                                                                 | 16 |
| <b>Table S2.</b> Overall stability constants of $\text{H}_3\text{L}^1$ complexes .....                                                                                                                                  | 16 |
| <b>Table S3.</b> Complexation rates and complexation half-times of $\text{Ga}^{\text{III}}$ ions with the studied chelators .....                                                                                       | 17 |
| <b>Figure S13.</b> Change of the $[\text{CuL}^1]$ complex absorbance at 265 nm in the course of $\text{Ga}^{\text{III}}$ complexation experiments at variable pH as a function of time .....                            | 18 |
| <b>Figure S14.</b> Change of the $\text{Cu}^{\text{II}}$ complex absorbances at 265 nm (280 for $\text{H}_3\text{L}^3$ ) in the course of $\text{Ga}^{\text{III}}$ complexation experiments as a function of time ..... | 19 |

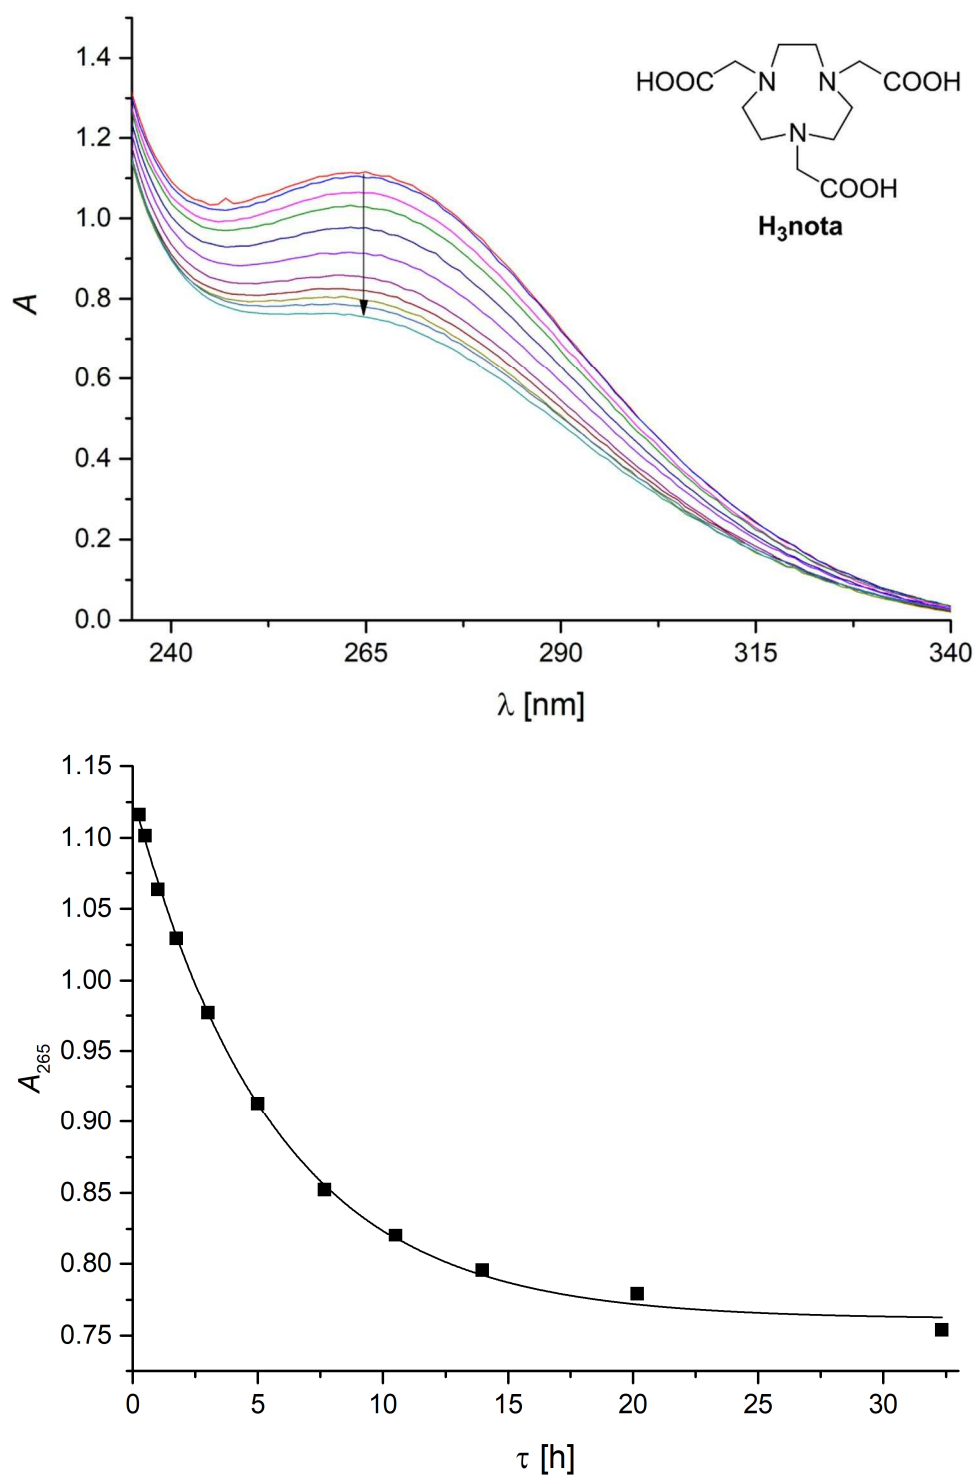

**Figure S1.** Example of change of the Cu<sup>II</sup> complex spectra in the course of Ga<sup>III</sup> complexation experiments with H<sub>3</sub>nota (top) and the corresponding Cu<sup>II</sup> complex absorbance at 265 nm as function of time (bottom). The line corresponds to the best fit according to Equation 1 (30 °C,  $c_{\text{chel}} = 0.4$  mM,  $c_{\text{Ga}} = 0.2$  mM, pH 1.25).

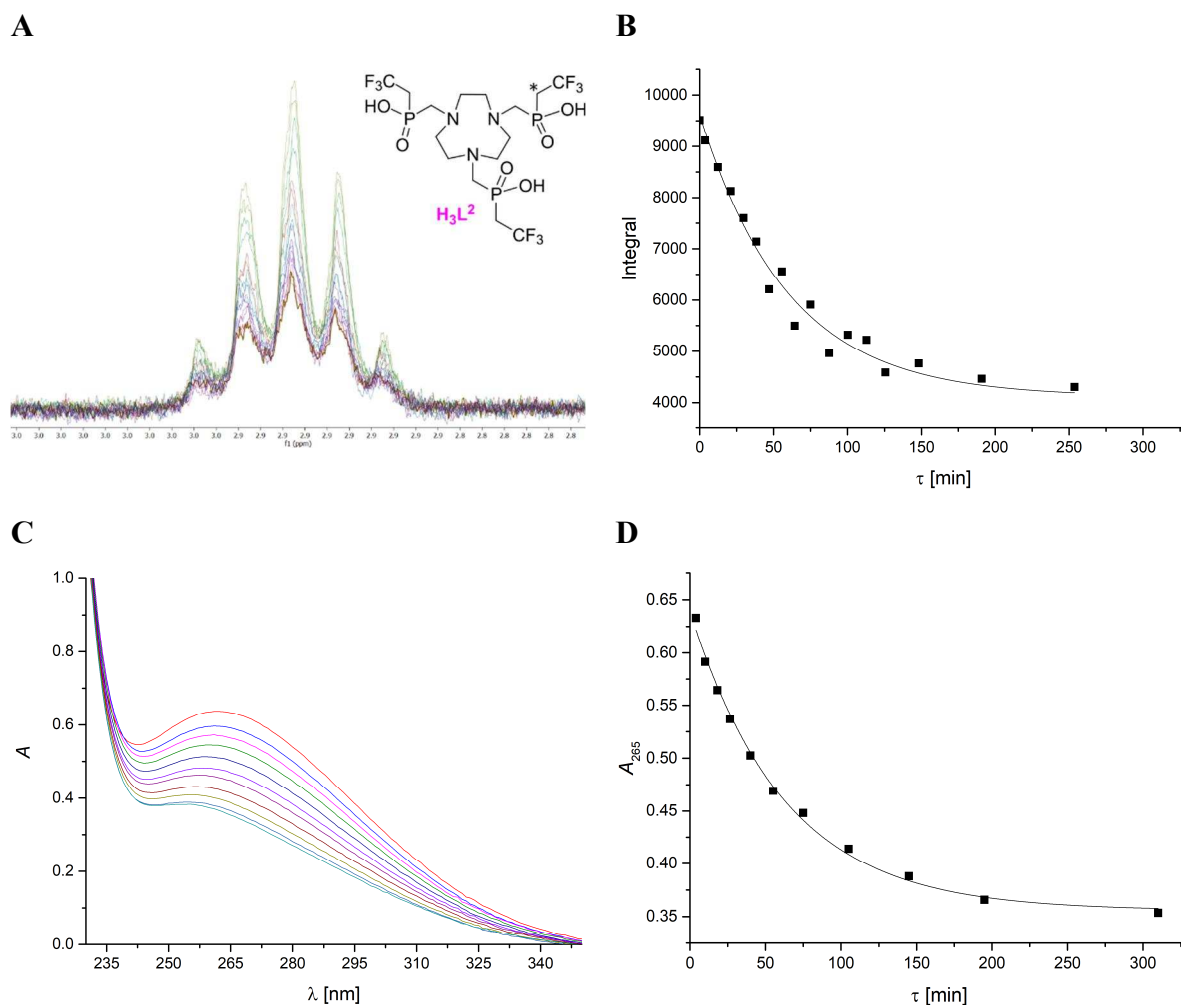

**Figure S2.** Comparison of UV-Vis and <sup>1</sup>H NMR data for Ga<sup>III</sup> complexation kinetics with H<sub>3</sub>L<sup>2</sup>. Change of P-CH<sub>2</sub>-CF<sub>3</sub> integral in <sup>1</sup>H NMR spectra during Ga<sup>III</sup> complexation experiment (A) and the integral intensity as a function of time (B). The line corresponds to the best fit according to Equation 2. Change of the Cu<sup>II</sup> complex spectra in the course of Ga<sup>III</sup> complexation experiments with H<sub>3</sub>L<sup>2</sup> (C) and the corresponding complex absorbance at 265 nm as function of time (D). The line corresponds to the best fit according to Equation 1 (30 °C, c<sub>chel</sub> = 0.4 mM, c<sub>Ga</sub> = 0.2 mM, pH 1.00).

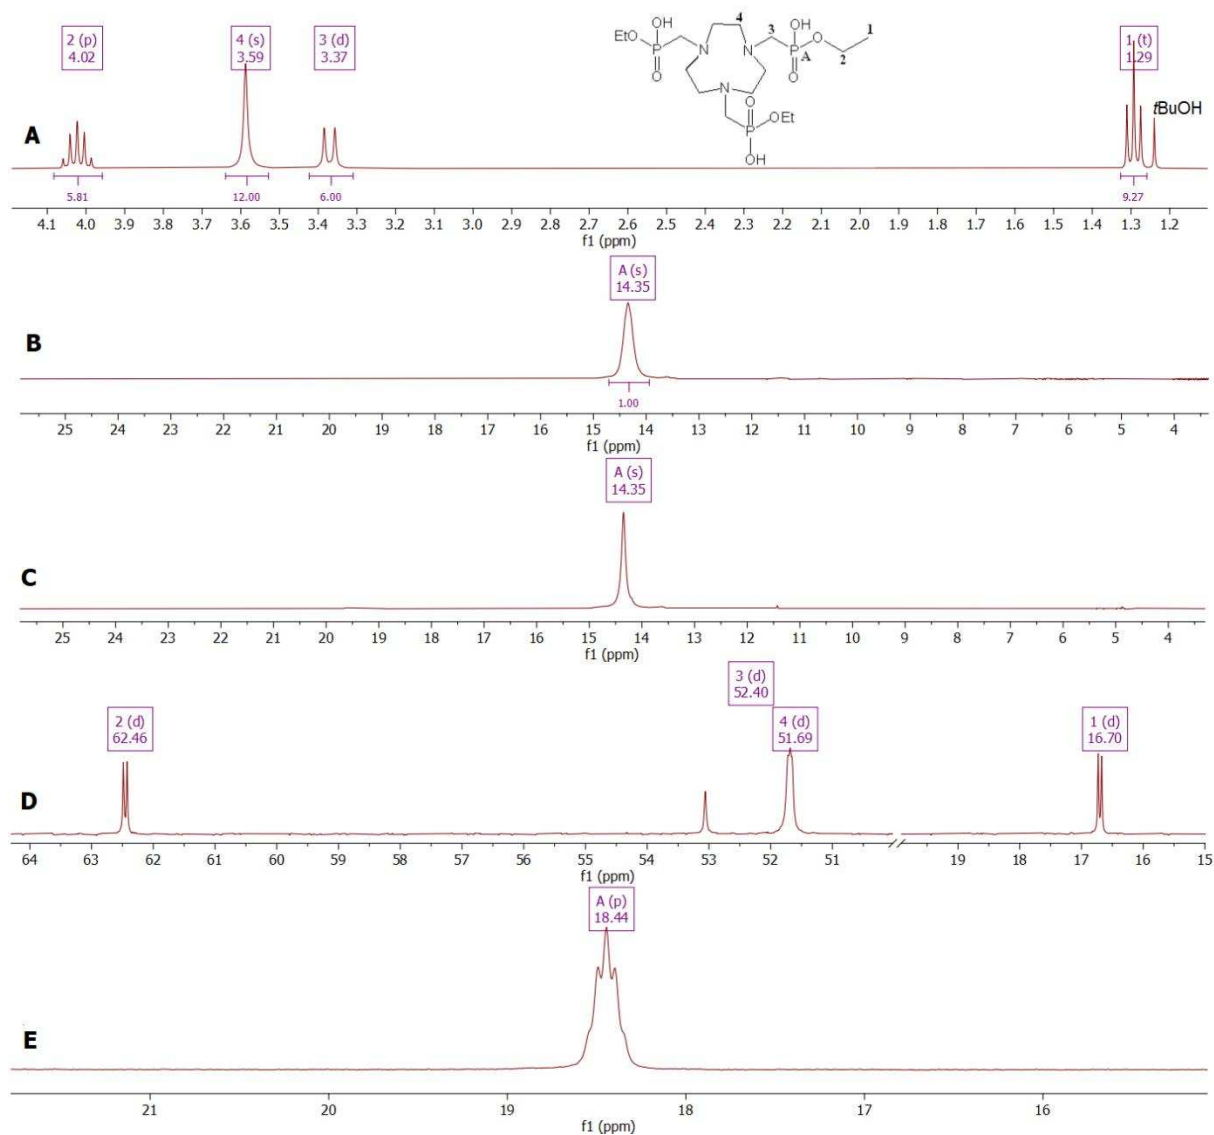

**Figure S3.**  $^1\text{H}$  (A),  $^{31}\text{P}$  (B),  $^{31}\text{P}\{^1\text{H}\}$  (C) and  $^{13}\text{C}\{^1\text{H}\}$  (D) NMR spectra of  $\text{H}_3\text{L}^1$  ( $\text{D}_2\text{O}$ , pD 1.4) and detail of  $^{31}\text{P}$  NMR spectra (E) (162 MHz,  $\text{D}_2\text{O}$  + NaOD, pD 10.4)

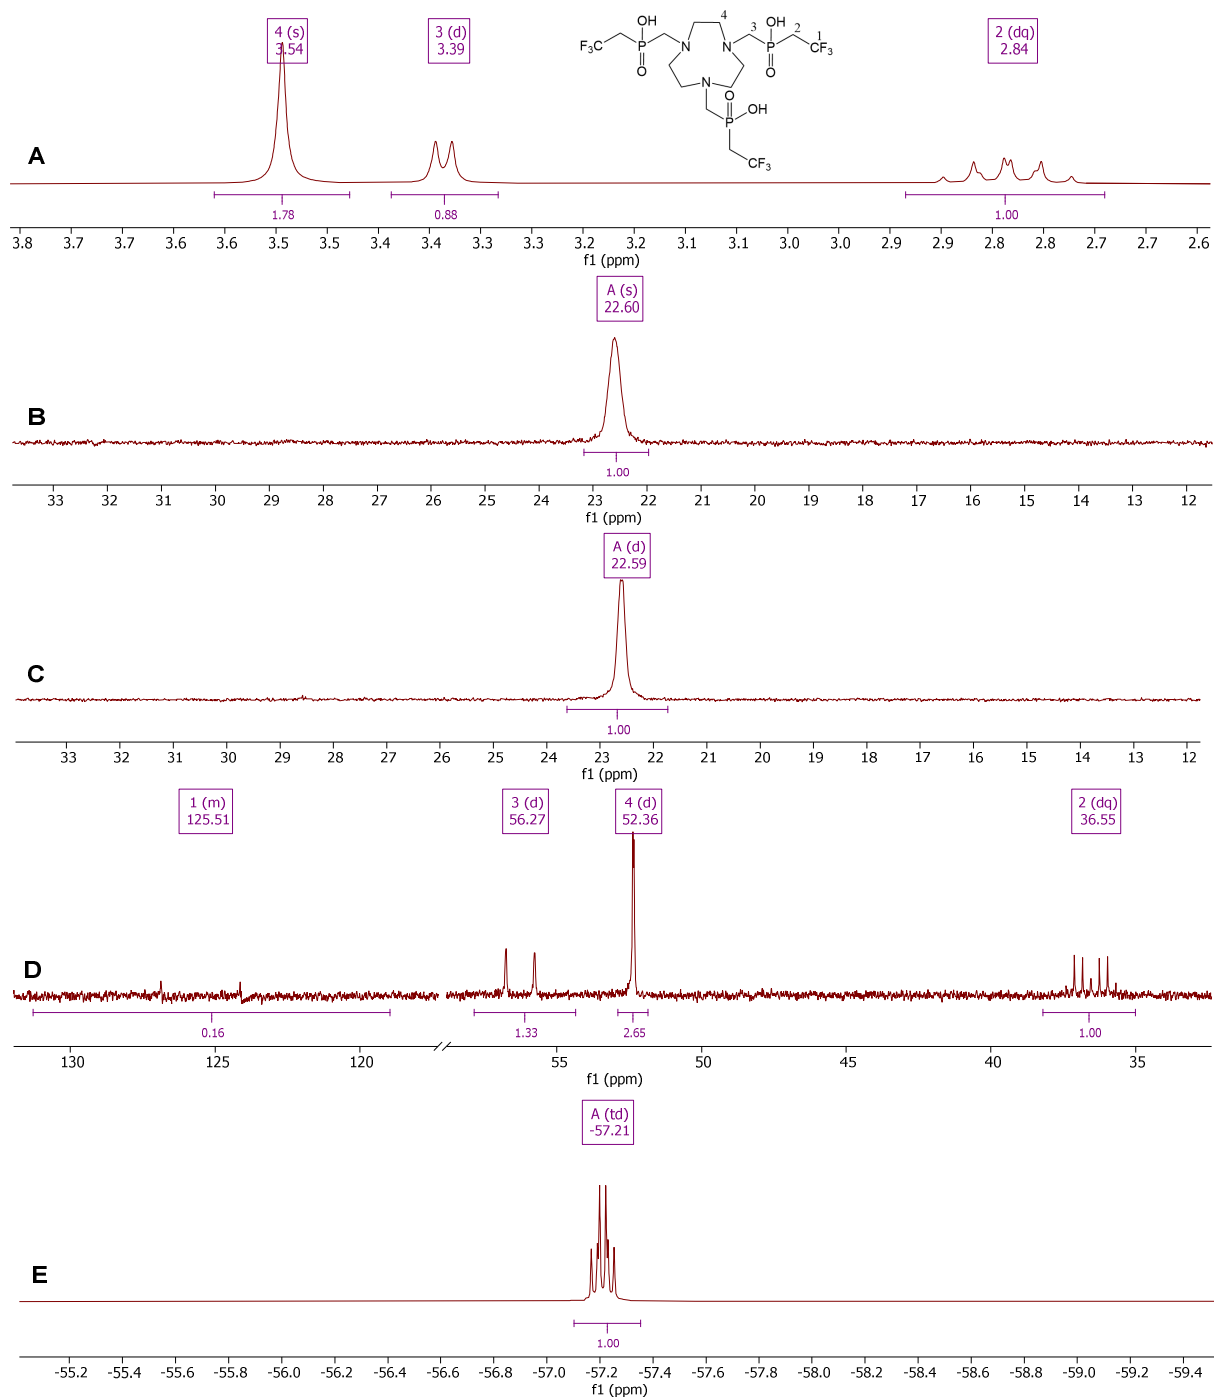

**Figure S4.**  $^1H$  (A),  $^{31}P$  (B),  $^{31}P\{^1H\}$  (C)  $^{13}C\{^1H\}$  (D),  $^{19}F$  (E) NMR spectra of  $H_3L^2$  ( $D_2O$ , pH 1.6)

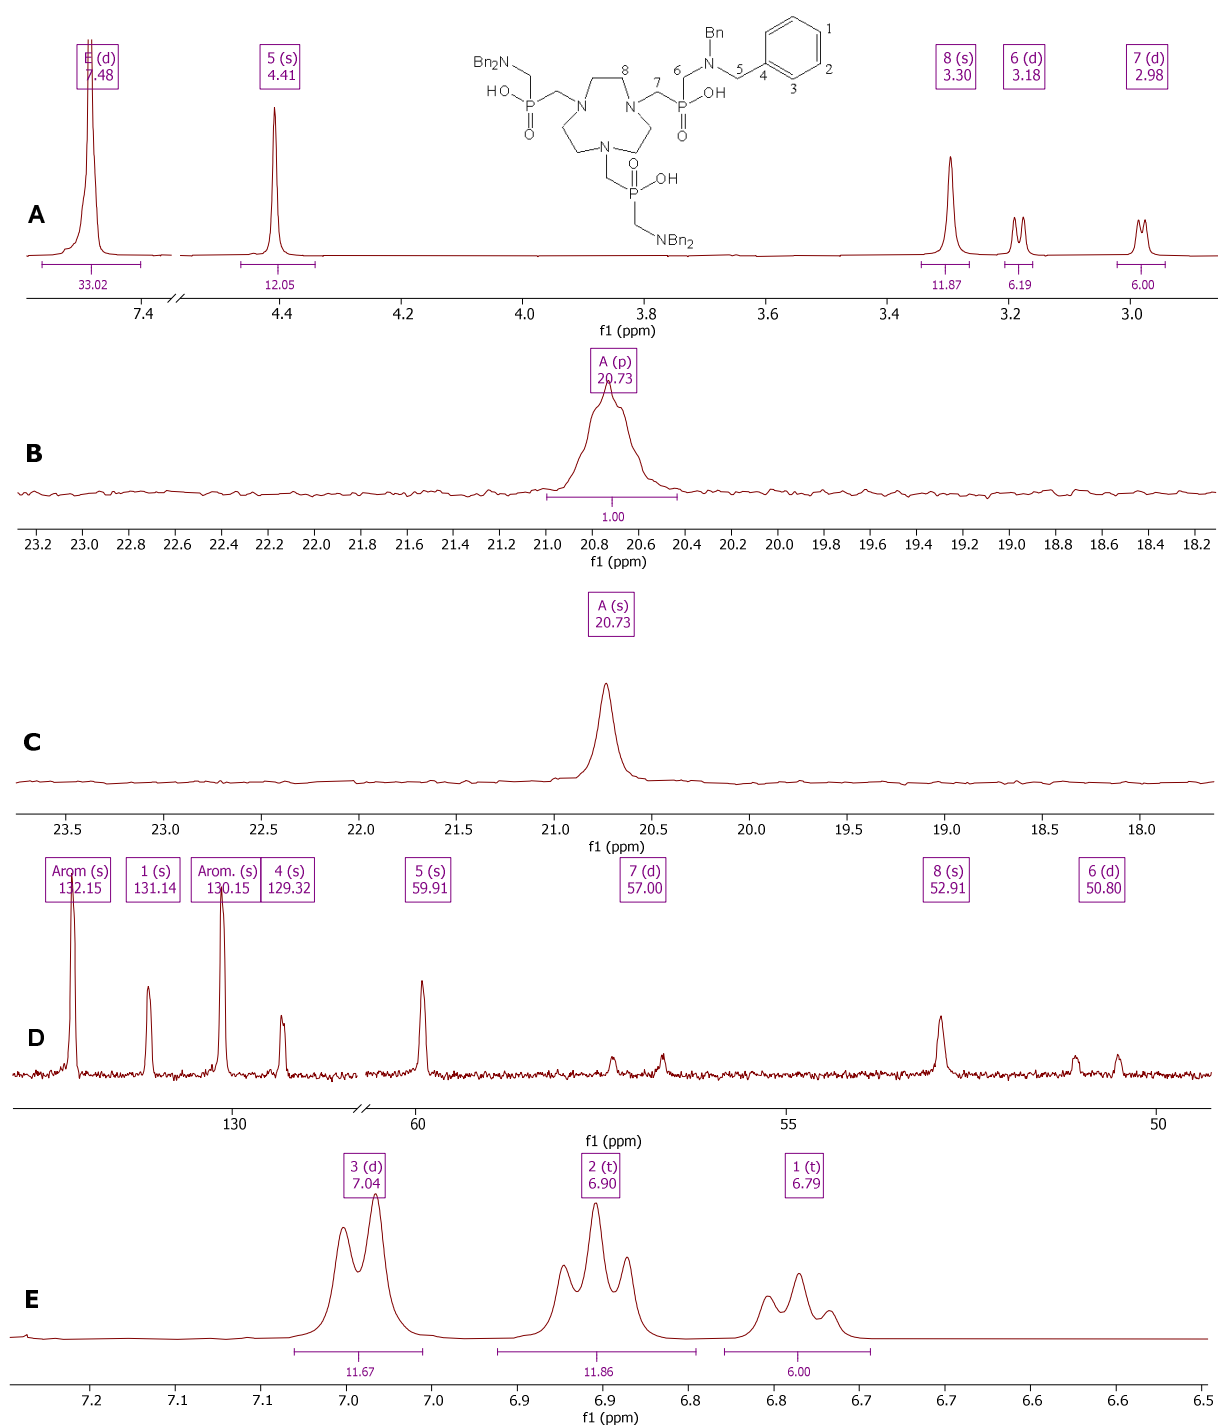

**Figure S5.**  $^1\text{H}$  (A),  $^{31}\text{P}$  (B),  $^{31}\text{P}\{^1\text{H}\}$  (C) and  $^{13}\text{C}\{^1\text{H}\}$  (D) NMR spectra of  $\text{H}_3\text{L}^3$  ( $\text{D}_2\text{O}$ , pH 1.9) and detail of aromatic region of  $^1\text{H}$  NMR spectra (E) ( $\text{D}_2\text{O} + \text{NaOD}$ , pH 10.7)

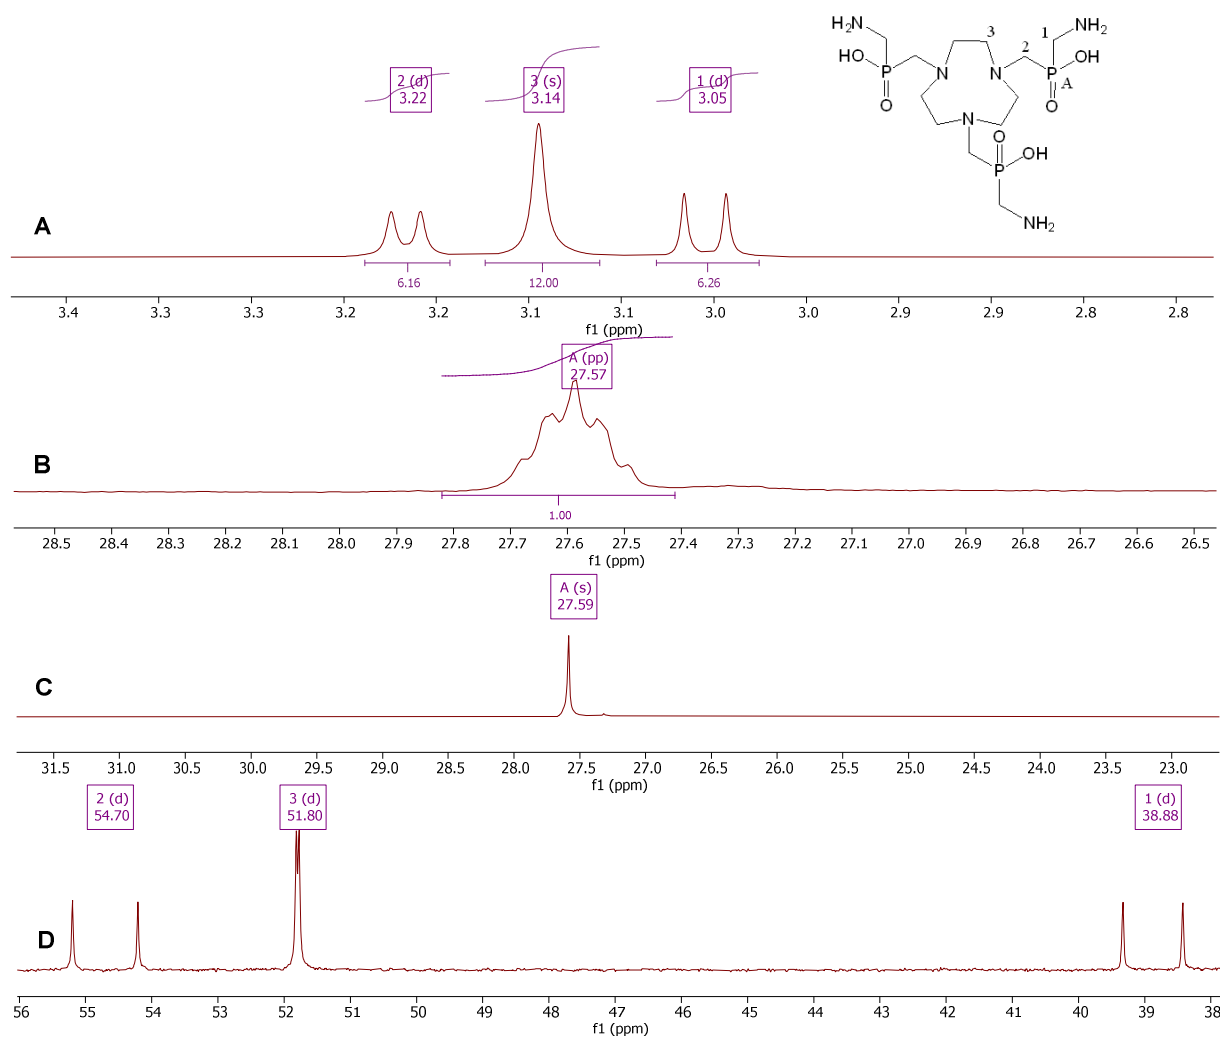

**Figure S6.**  $^1\text{H}$  (A),  $^{31}\text{P}$  (B),  $^{31}\text{P}\{^1\text{H}\}$  (C) and  $^{13}\text{C}\{^1\text{H}\}$  (D) NMR spectra of  $\text{H}_3\text{L}^4$  ( $\text{D}_2\text{O}$ , pD 8.0)



## Characterisation of gallium(III) complexes

### Ga-L<sup>1</sup>

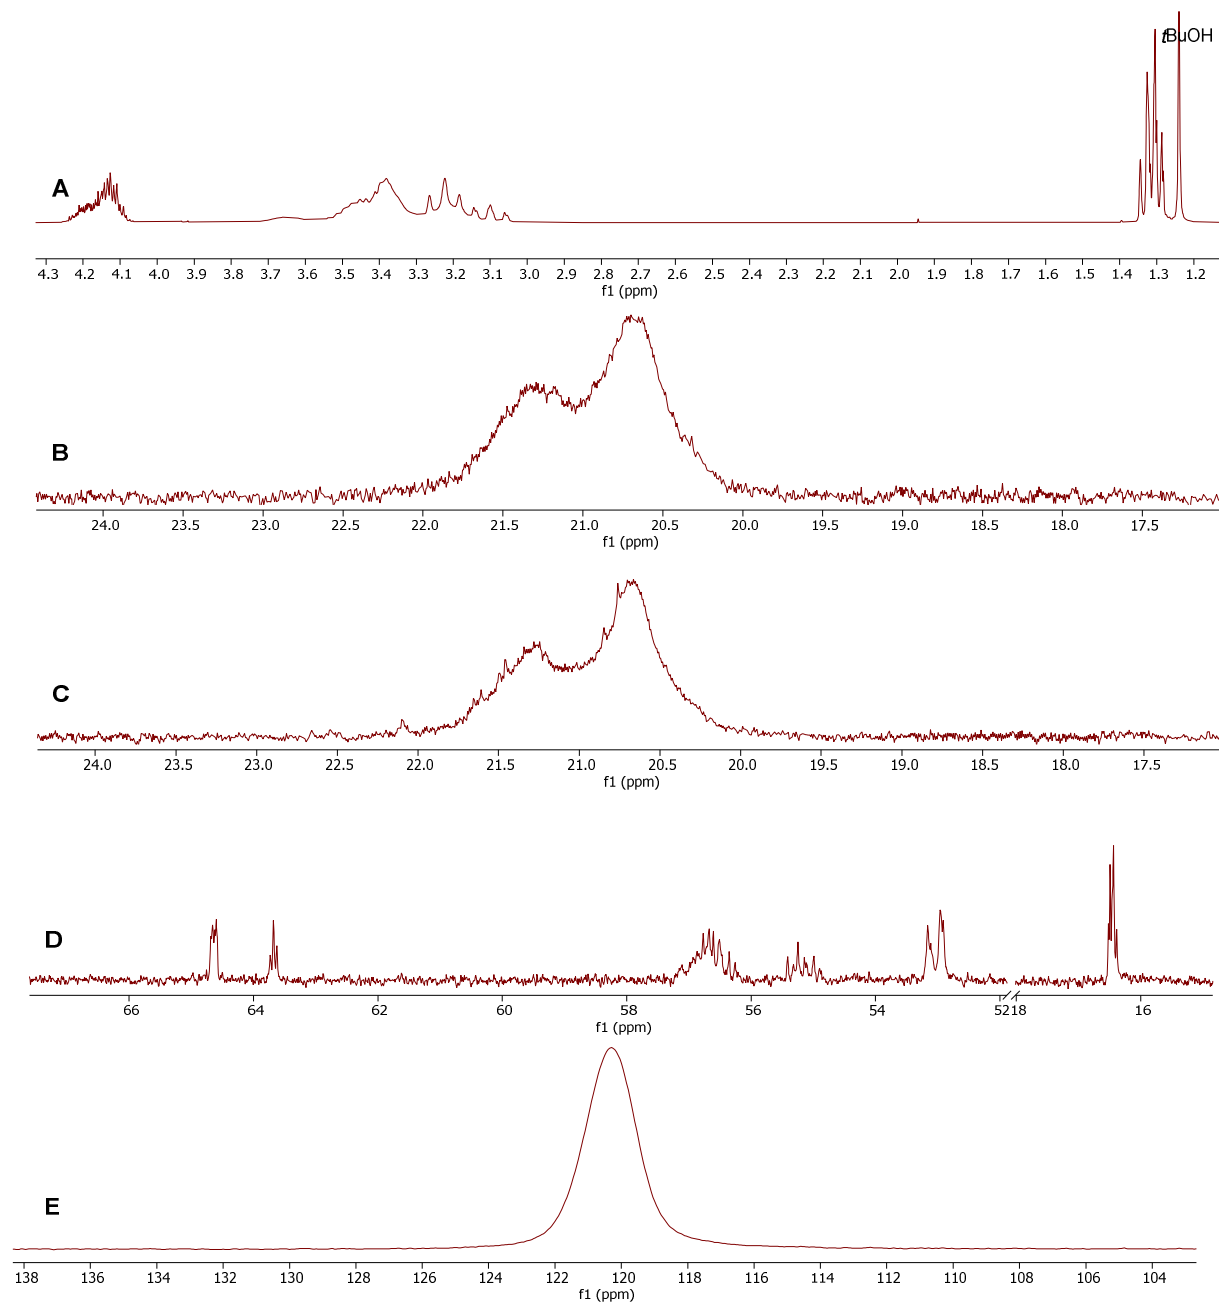

**Figure S7a.** <sup>1</sup>H (A), <sup>31</sup>P (B), <sup>31</sup>P{<sup>1</sup>H} (C), <sup>13</sup>C{<sup>1</sup>H} (D) and <sup>71</sup>Ga (E) NMR spectra of [GaL<sup>1</sup>] at 25 °C (D<sub>2</sub>O, pD 7.6)

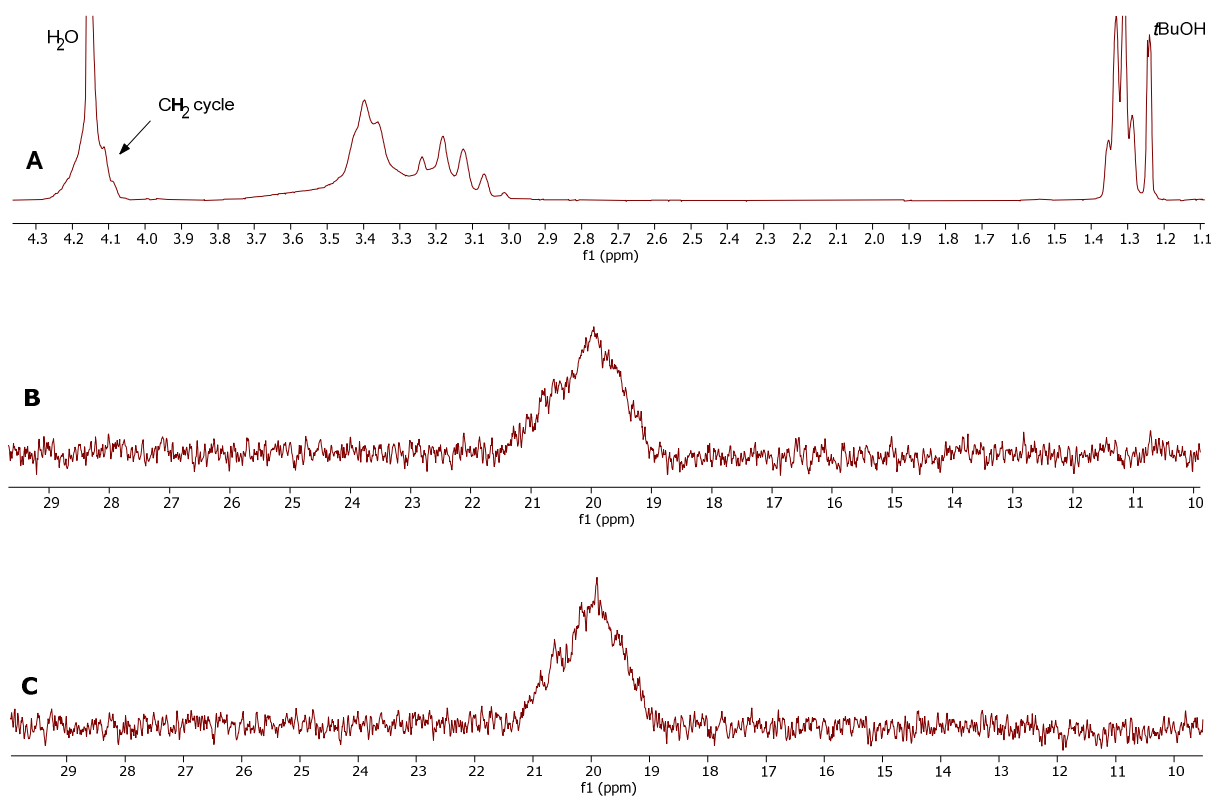

**Figure S7b.** <sup>1</sup>H (A), <sup>31</sup>P (B) and <sup>31</sup>P{<sup>1</sup>H} (C) NMR spectra of [GaL<sup>1</sup>] at 90 °C (D<sub>2</sub>O, pD 6.2)

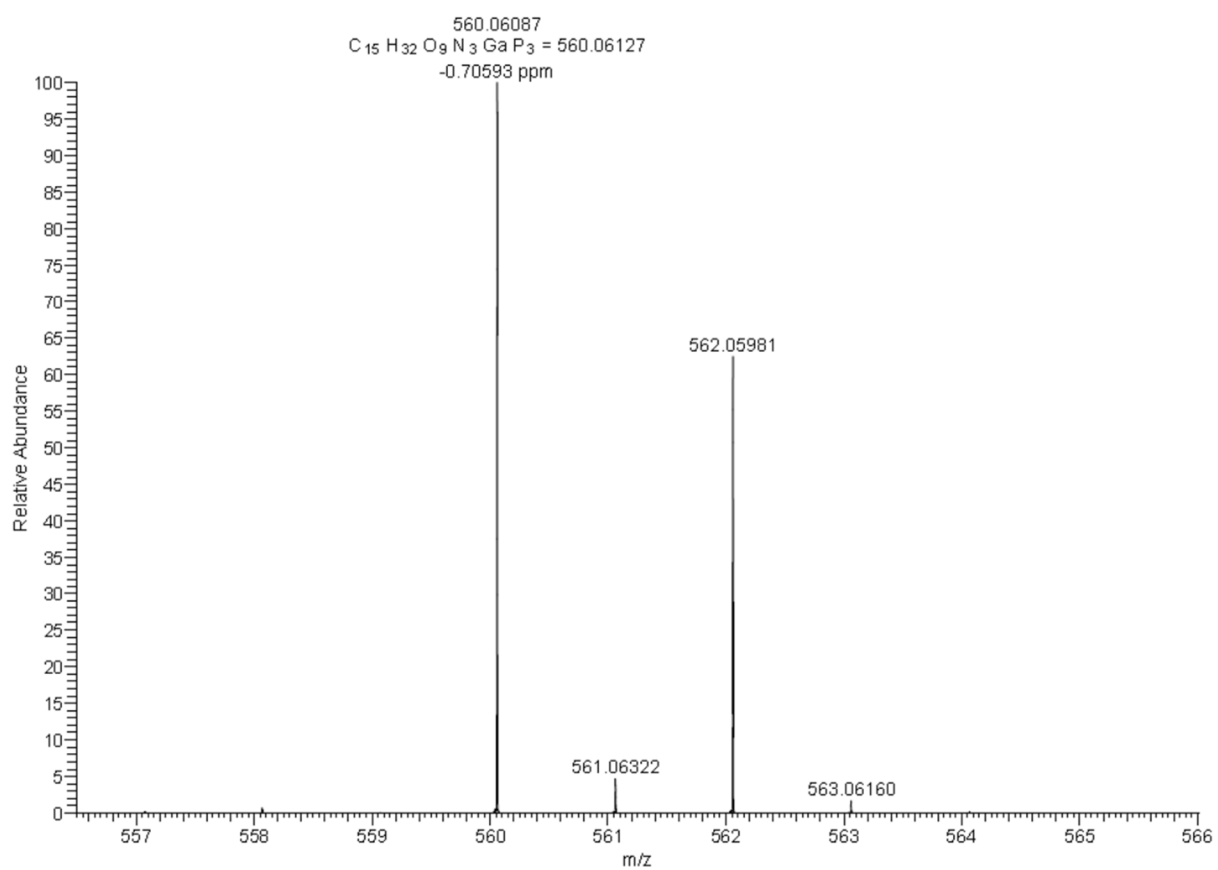

**Figure S8.** High-resolution mass spectra of [GaL<sup>1</sup>] in the negative mode

## Ga-L<sup>2</sup>

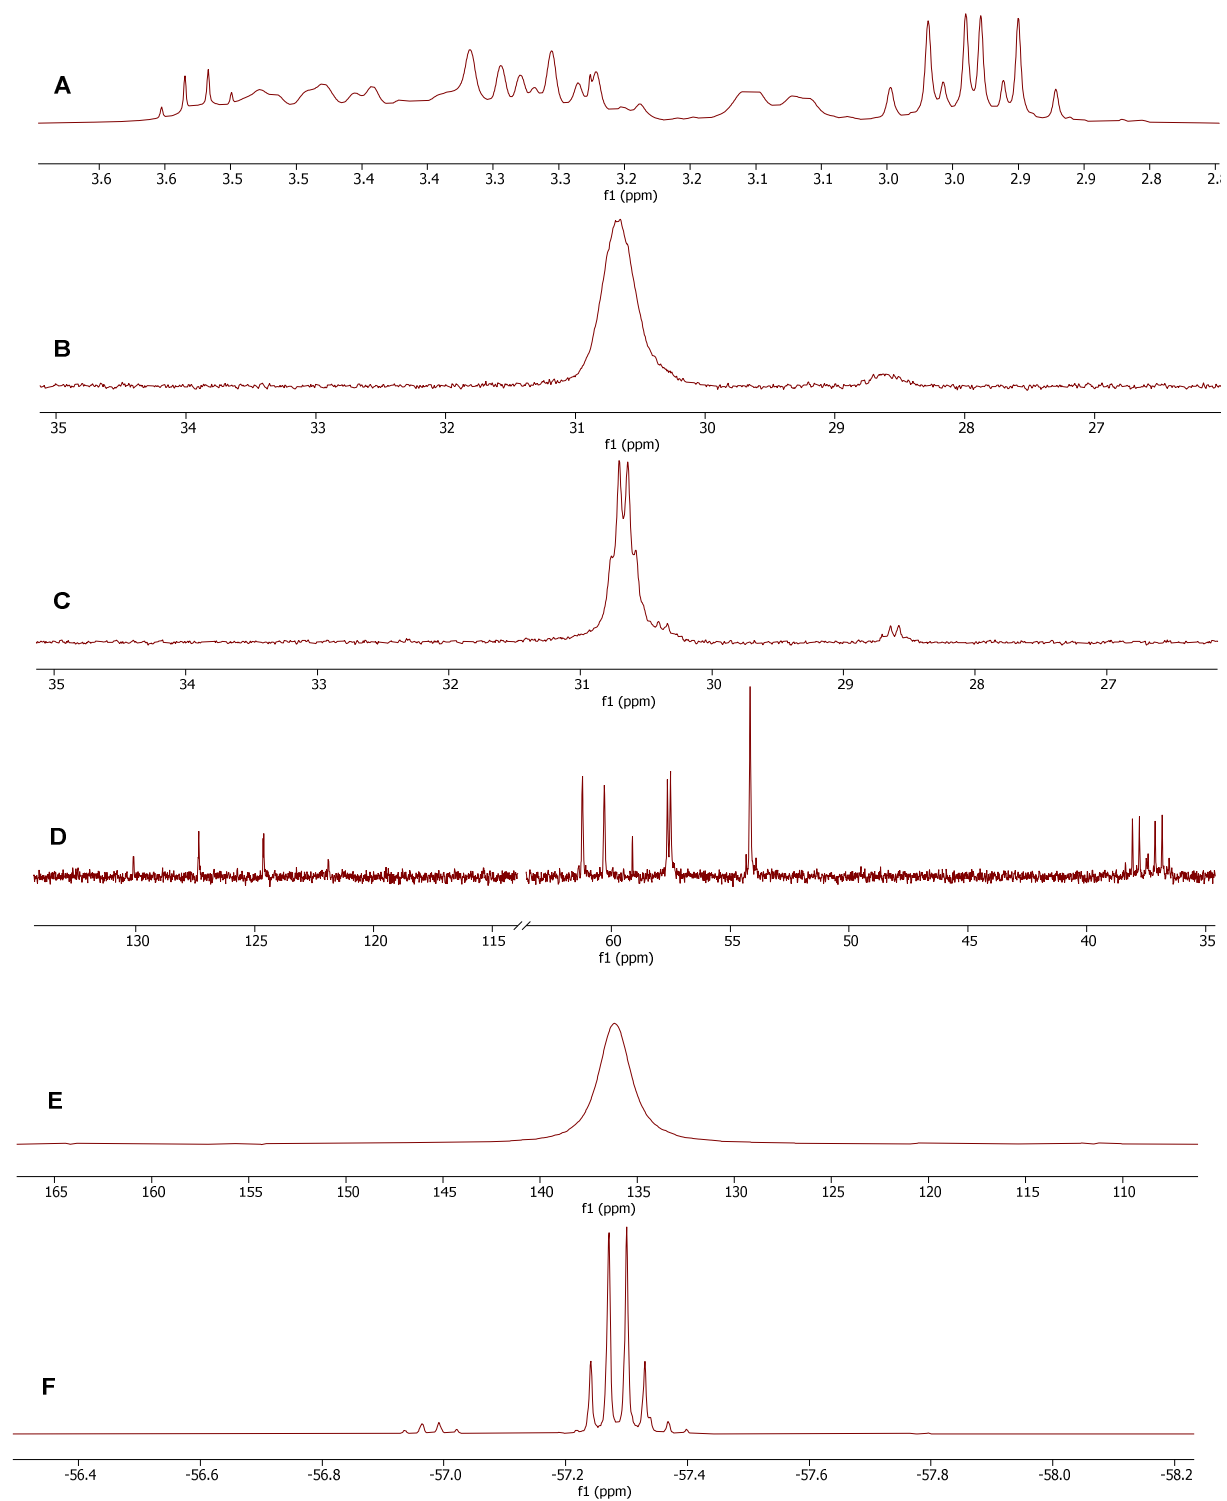

**Figure S9.** <sup>1</sup>H (A), <sup>31</sup>P (B), <sup>31</sup>P{<sup>1</sup>H} (C), <sup>13</sup>C{<sup>1</sup>H} (D), <sup>71</sup>Ga (E) and <sup>19</sup>F (F) NMR spectra of [GaL<sup>2</sup>] (D<sub>2</sub>O, pD 5.4)

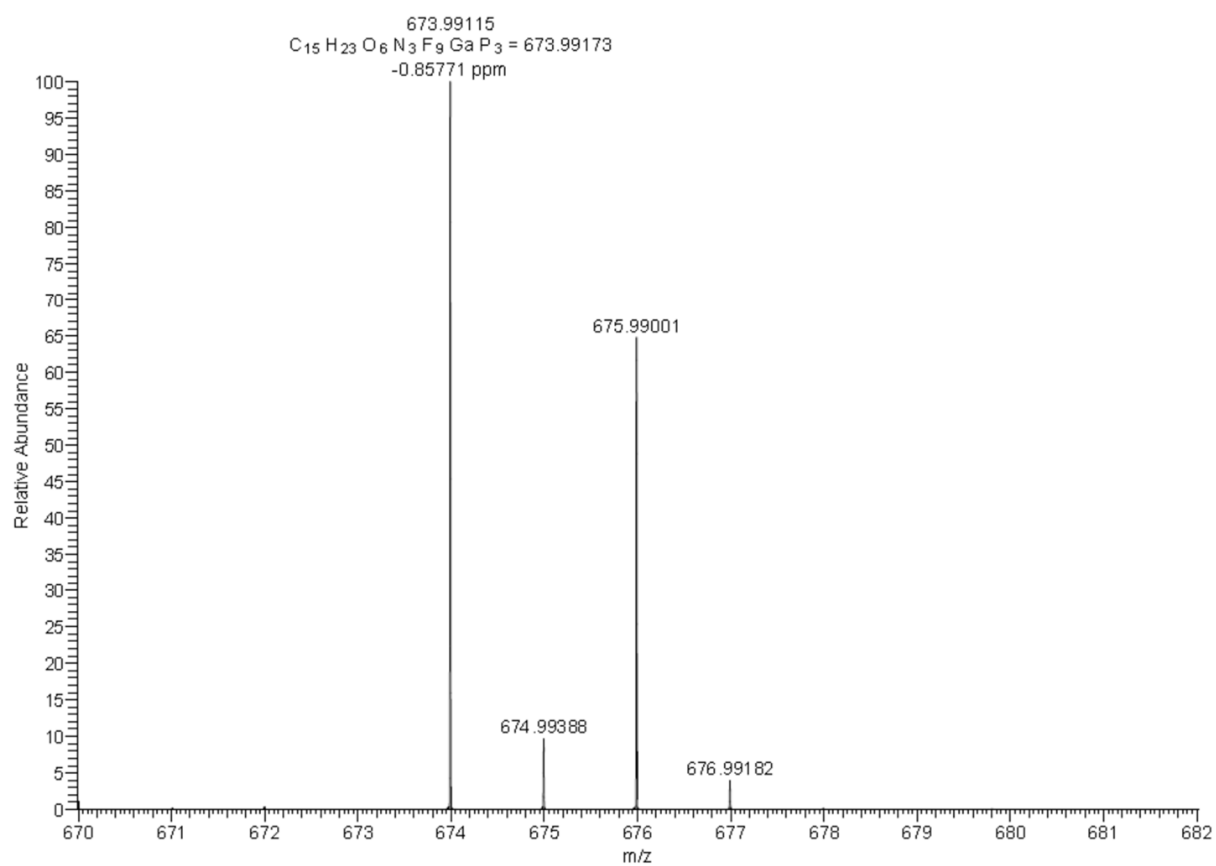

**Figure S10.** High-resolution mass spectra of  $[GaL^2]$  in the negative mode

# Ga-L<sup>4</sup>

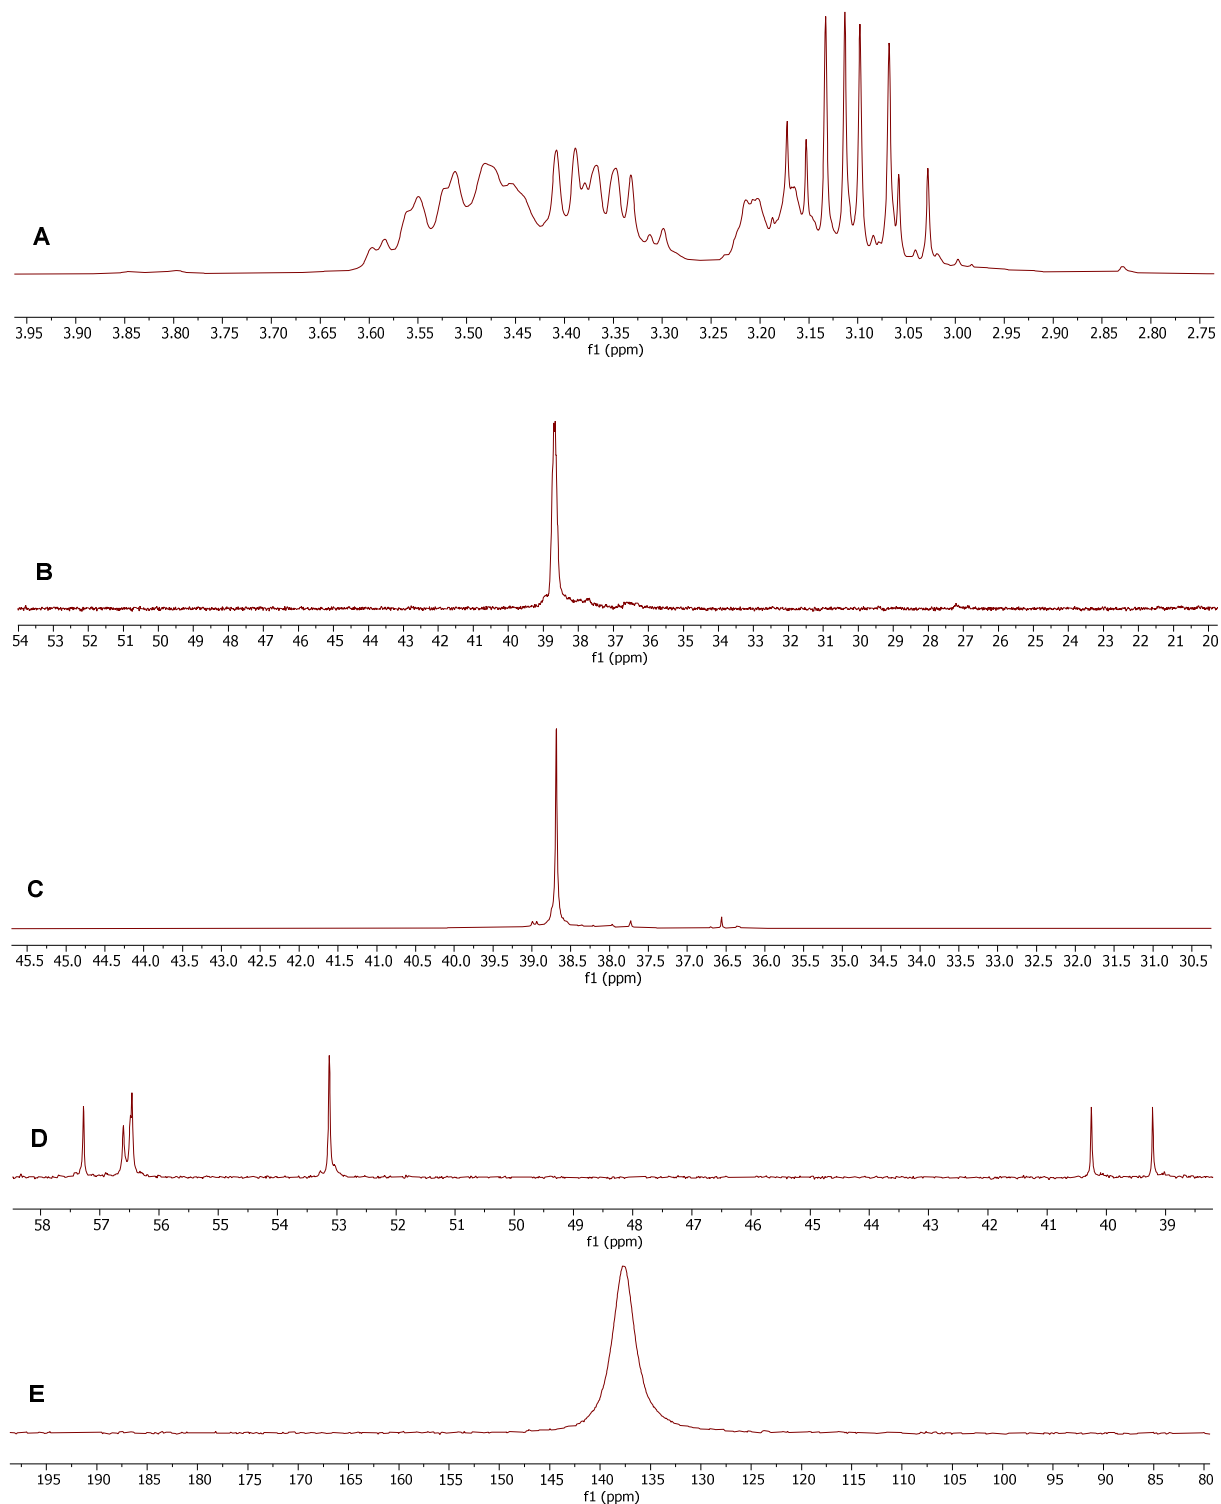

**Figure S11.** <sup>1</sup>H (A), <sup>31</sup>P (B), <sup>31</sup>P{<sup>1</sup>H} (C), <sup>13</sup>C{<sup>1</sup>H} (D) and <sup>71</sup>Ga (E) NMR spectra of [GaL<sup>4</sup>] (D<sub>2</sub>O, pD 7.6)

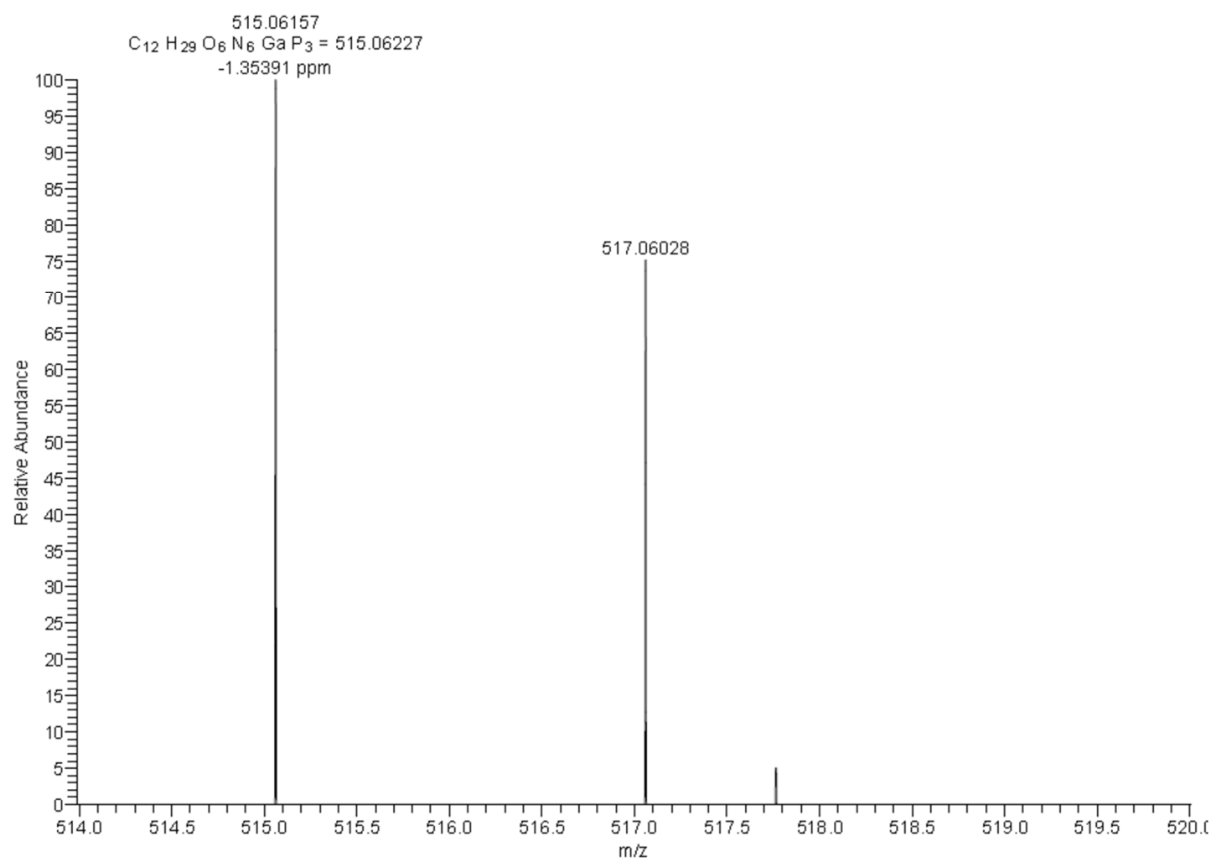

**Figure S12.** High-resolution mass spectra of [GaL<sup>4</sup>] in the negative mode

**Table S1.** Overall protonation constants ( $\log\beta$ ) of ligands  $\text{H}_3\text{L}^1$  and  $\text{H}_3\text{L}^3$  ( $I = 0.1\text{M}$  ( $\text{NMe}_4$ )Cl, 25 °C)

| Species              | $\text{H}_3\text{L}^1$ | $\text{H}_3\text{L}^4$ |
|----------------------|------------------------|------------------------|
| HL                   | 11.54(2)               | 11.21(1)               |
| $\text{H}_2\text{L}$ | 14.97(5)               | 20.04(2)               |
| $\text{H}_3\text{L}$ | 16.37(6)               | 28.20(1)               |
| $\text{H}_4\text{L}$ | -                      | 35.50(1)               |
| $\text{H}_5\text{L}$ | -                      | 37.59(2)               |

**Table S2.** Overall stability constants ( $\log\beta$ ) of  $\text{H}_3\text{L}^1$  complexes ( $I = 0.1\text{M}$  ( $\text{NMe}_4$ )Cl, 25 °C)

| Species    | $\text{Ga}^{\text{III}}$ | $\text{Cu}^{\text{II}}$ |
|------------|--------------------------|-------------------------|
| [M(L)]     | 20.5(3)                  | 14.7(5)                 |
| [M(HL)]    | 22.3(3)                  | -                       |
| [M(L)(OH)] | 14.1(2)                  | 3.69(6)                 |



**Table S3.** Rate constants and times necessary for 99% complexation of Ga<sup>III</sup> complexation with the studied chelators as function of pH obtained by UV-Vis experiments ( $c_{\text{chel}} = 0.4 \text{ mM}$ ,  $c_{\text{Ga}} = 0.2 \text{ mM}$ ,  $30 \text{ }^\circ\text{C}$ , pH 0.25–3.0)

| H <sub>3</sub> notP <sup>Pr</sup> |                                  |                       |            | H <sub>3</sub> L <sup>2</sup> |                                  |                       |            |
|-----------------------------------|----------------------------------|-----------------------|------------|-------------------------------|----------------------------------|-----------------------|------------|
| pH                                | $k_{\text{obs}} [\text{s}^{-1}]$ | $t_{99\%} [\text{s}]$ | $t_{99\%}$ | pH                            | $k_{\text{obs}} [\text{s}^{-1}]$ | $t_{99\%} [\text{s}]$ | $t_{99\%}$ |
| 0.25                              | $1.2(2) \cdot 10^{-5}$           | $3.8 \cdot 10^5$      | 107 h      | 0.50                          | $1.51(8) \cdot 10^{-5}$          | $3.05 \cdot 10^5$     | 85 h       |
| 0.50                              | $7.1(4) \cdot 10^{-5}$           | $6.5 \cdot 10^4$      | 18 h       | 1.00                          | $2.7(2) \cdot 10^{-4}$           | $1.7 \cdot 10^4$      | 5 h        |
| 1.00                              | $1.61(7) \cdot 10^{-3}$          | $2.86 \cdot 10^3$     | 48 min     | 1.60                          | $2.9(3) \cdot 10^{-3}$           | $1.6 \cdot 10^3$      | 27 min     |
| 1.50                              | $1.6(2) \cdot 10^{-2}$           | 290                   | 5 min      | 2.00                          | $7.5(5) \cdot 10^{-3}$           | 620                   | 10 min     |
| 2.05                              | $9.3(4) \cdot 10^{-2}$           | 49                    | 49 s       | 2.45                          | $3.2(1) \cdot 10^{-2}$           | 140                   | 2 min      |

  

| H <sub>3</sub> nota |                                  |                       |            | H <sub>3</sub> L <sup>3</sup> |                                  |                       |            |
|---------------------|----------------------------------|-----------------------|------------|-------------------------------|----------------------------------|-----------------------|------------|
| pH                  | $k_{\text{obs}} [\text{s}^{-1}]$ | $t_{99\%} [\text{s}]$ | $t_{99\%}$ | pH                            | $k_{\text{obs}} [\text{s}^{-1}]$ | $t_{99\%} [\text{s}]$ | $t_{99\%}$ |
| 1.00                | $9.5(9) \cdot 10^{-6}$           | $4.8 \cdot 10^5$      | 135 h      | 1.65                          | $7.1(4) \cdot 10^{-5}$           | $6.4 \cdot 10^4$      | 18 h       |
| 1.25                | $5.0(2) \cdot 10^{-5}$           | $9.3 \cdot 10^4$      | 26 h       | 2.00                          | $2.8(2) \cdot 10^{-4}$           | $1.6 \cdot 10^4$      | 4 h        |
| 1.55                | $3.0(2) \cdot 10^{-4}$           | $1.5 \cdot 10^4$      | 4 h        | 2.60                          | $2.3(2) \cdot 10^{-3}$           | $2.0 \cdot 10^3$      | 33 min     |
| 2.00                | $2.9(2) \cdot 10^{-3}$           | $1.6 \cdot 10^3$      | 26 min     | 3.00                          | $1.2(1) \cdot 10^{-2}$           | 380                   | 6 min      |
| 2.60                | $5.2(3) \cdot 10^{-2}$           | 88                    | 88 s       |                               |                                  |                       |            |

  

| H <sub>3</sub> L <sup>1</sup> |                                  |                       |            | H <sub>3</sub> L <sup>4</sup> |                                  |                       |            |
|-------------------------------|----------------------------------|-----------------------|------------|-------------------------------|----------------------------------|-----------------------|------------|
| pH                            | $k_{\text{obs}} [\text{s}^{-1}]$ | $t_{99\%} [\text{s}]$ | $t_{99\%}$ | pH                            | $k_{\text{obs}} [\text{s}^{-1}]$ | $t_{99\%} [\text{s}]$ | $t_{99\%}$ |
| 0.50                          | $8.6(3) \cdot 10^{-6}$           | $5.3 \cdot 10^5$      | 149 h      | 1.00                          | $1.9(2) \cdot 10^{-5}$           | $2.4 \cdot 10^5$      | 68 h       |
| 1.00                          | $1.47(9) \cdot 10^{-4}$          | $3.12 \cdot 10^4$     | 9 h        | 1.65                          | $1.3(1) \cdot 10^{-4}$           | $3.4 \cdot 10^4$      | 10 h       |
| 1.60                          | $1.22(6) \cdot 10^{-3}$          | $3.77 \cdot 10^3$     | 62 min     | 2.00                          | $3.4(3) \cdot 10^{-4}$           | $1.3 \cdot 10^4$      | 4 h        |
| 2.00                          | $3.5(2) \cdot 10^{-3}$           | $1.3 \cdot 10^3$      | 21 min     | 2.60                          | $2.3(2) \cdot 10^{-3}$           | $2.0 \cdot 10^3$      | 34 min     |
| 2.55                          | $1.89(4) \cdot 10^{-2}$          | 243                   | 4 min      | 3.00                          | $8.2(6) \cdot 10^{-3}$           | 560                   | 9 min      |

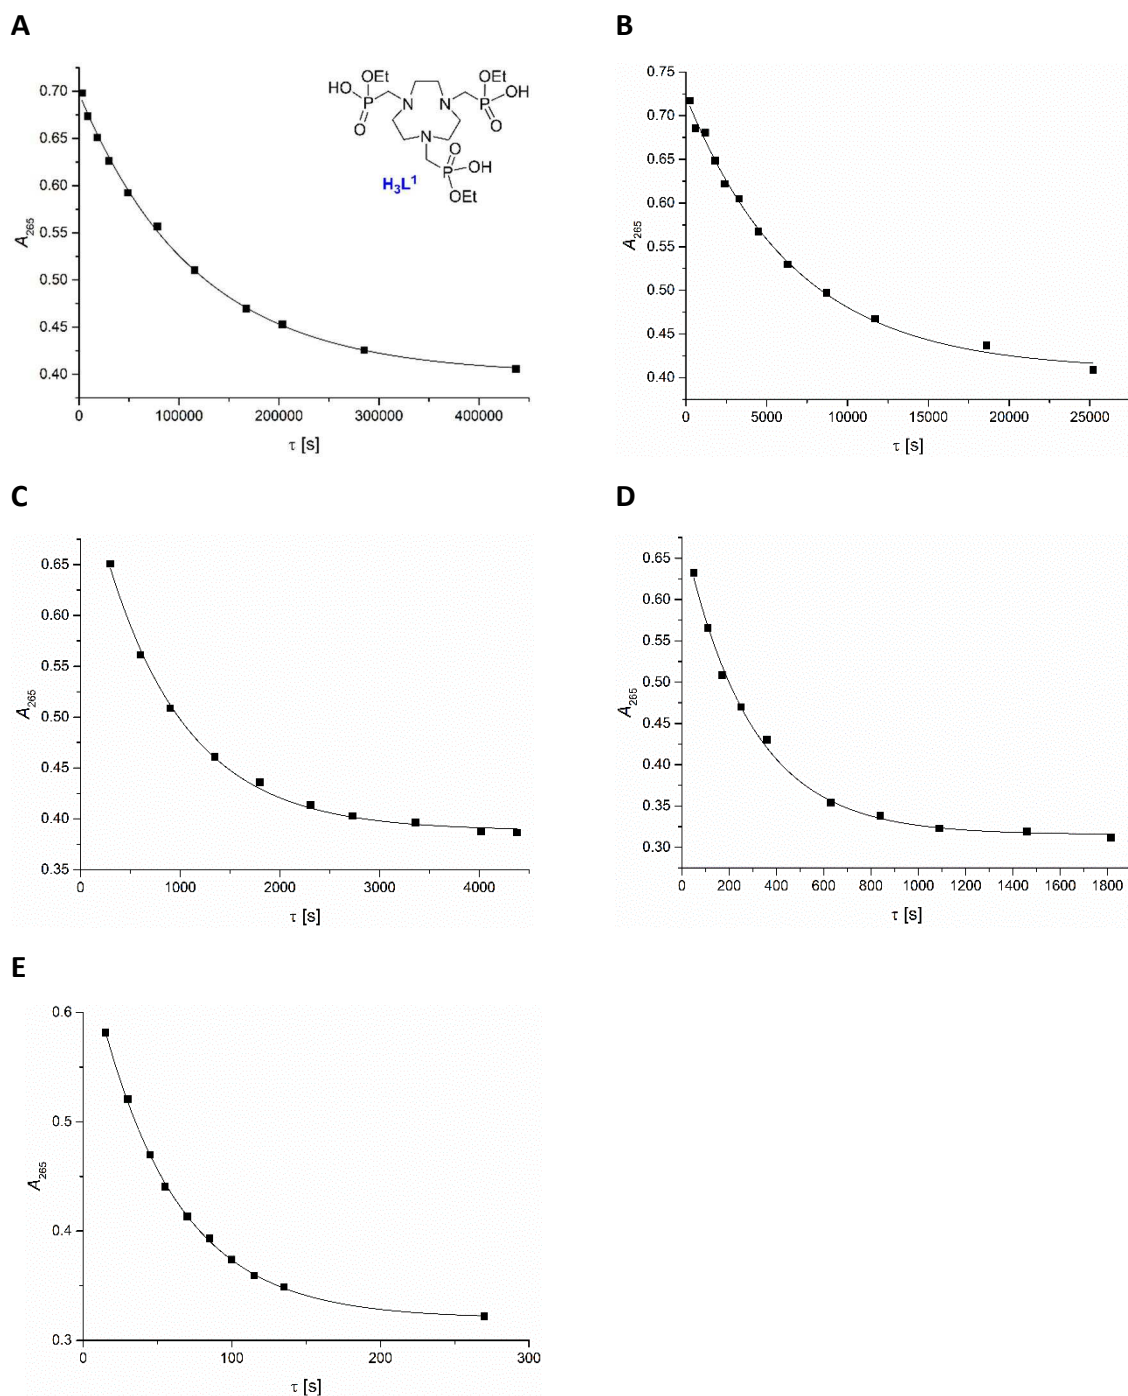

**Figure S13.** Change of the [CuL<sup>1</sup>] complex absorbance at 265 nm in the course of Ga<sup>III</sup> complexation experiments at pH 0.50 (A), 1.00 (B), 1.60 (C), 2.00 (D), 2.55 (E) as a function of time. The lines correspond to the best fit according to Equation 1 (30 °C,  $c_{\text{chel}} = 0.4$  mM,  $c_{\text{Ga}} = 0.2$  mM).

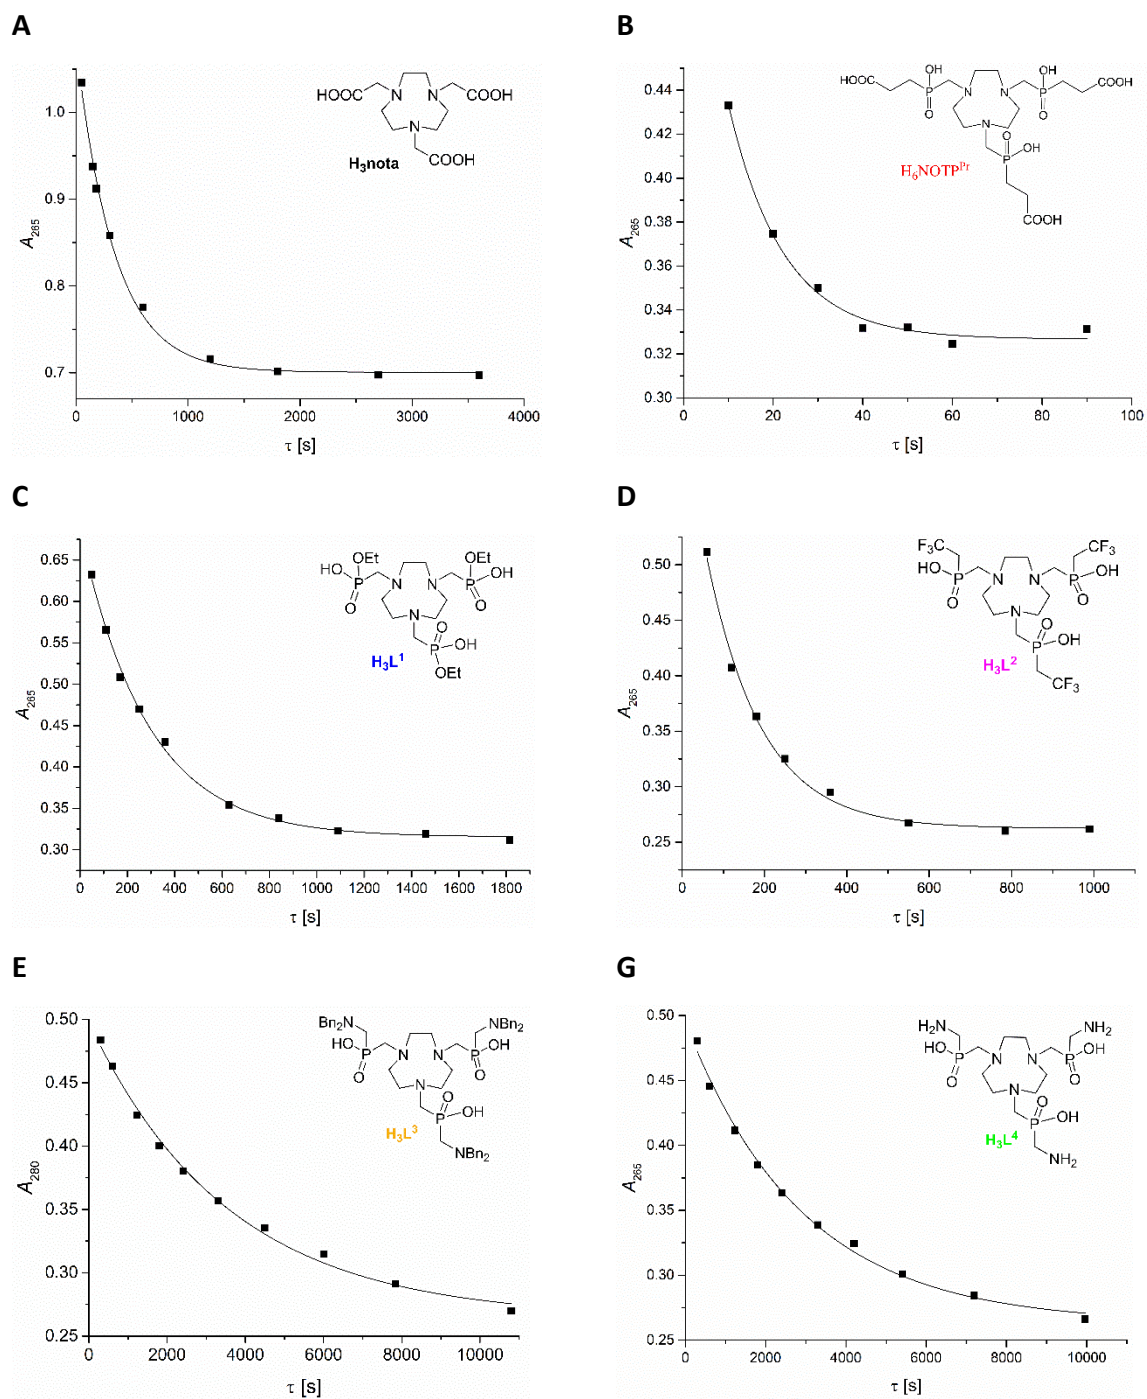

**Figure S14.** Change of the Cu<sup>II</sup> complex absorbances at 265 nm (280 for H<sub>3</sub>L<sup>3</sup>) in the course of Ga<sup>III</sup> complexation experiments as a function of time for H<sub>3</sub>nota (A), H<sub>6</sub>notP<sup>Pr</sup> (B), H<sub>3</sub>L<sup>1</sup> (C), H<sub>3</sub>L<sup>2</sup> (D), H<sub>3</sub>L<sup>3</sup> (E), H<sub>3</sub>L<sup>4</sup> (F). The lines correspond to the best fit according to Equation 1 (30 °C,  $c_{\text{chel}} = 0.4$  mM,  $c_{\text{Ga}} = 0.2$  mM).
